# Supplementary material
Source: publisher figshare collection journal article supplement (https://frontiersin.figshare.com/ndownloader/files/26240905)
Supplement: Supplementary file [file 26240905]

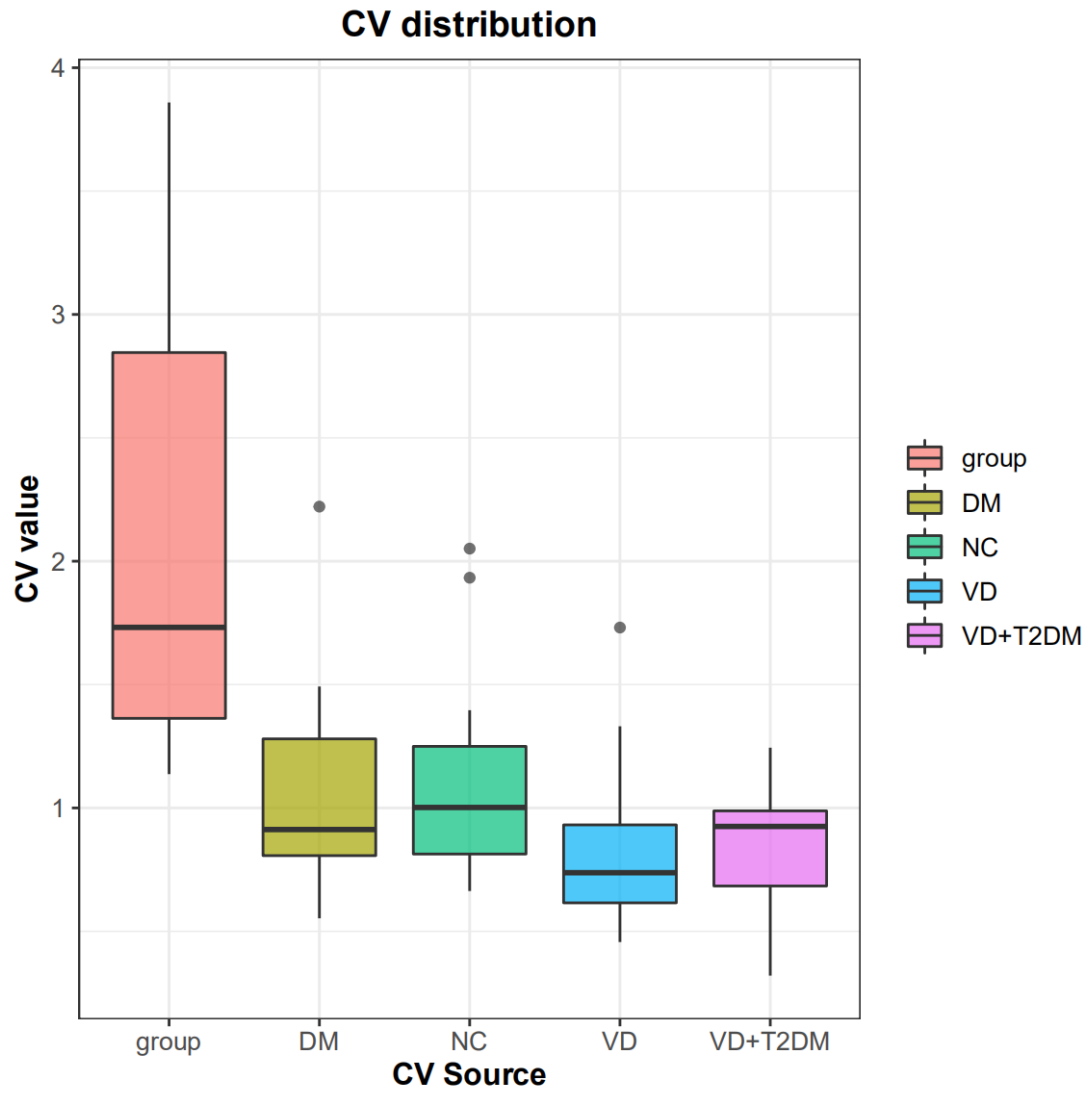

**Fig. S1** Inter-individual variations of the urine proteome calculated from 13 urinary proteins(P00738, P05546, P24539, O95498, Q6PKA6, A0A5C2GRG5, A0A5C2FZ29, P07911, Q8N5N7, A5PLM9, B3KY78, A0A384MDZ8, A0A5C2FWX9)
